# Supplementary material for: Evolution of the use, effectiveness and safety of bismuth-containing quadruple therapy for Helicobacter pylori infection between 2013 and 2021: results from the European registry on H. pylori management (Hp-EuReg)
Source: PubMed Central journal article supplement — Gut. 2024 Oct 26;74(1):e332804. doi: 10.1136/gutjnl-2024-332804 (PMC11671959; doi:10.1136/gutjnl-2024-332804), 2024-10-26
Supplement: gutjnl-74-1-s001.pdf [file gutjnl-74-1-s001.pdf]

## **SUPPLEMENTARY MATERIAL**

### **Supplementary file 1. Hp-EuReg investigators.**

Jesús Barrio, Department of Gastroenterology, Hospital Universitario Río Hortega, Gerencia Regional de Salud de Castilla y León (SACYL), Valladolid, SPAIN. Acquired data, critically reviewed the manuscript draft, and approved the submitted manuscript.

Liudmila Vologzhanina, Department of Gastroenterology, Gastrocentre, Perm, RUSSIA. Acquired data, critically reviewed the manuscript draft, and approved the submitted manuscript.

Dino Vaira, Department of Medical and Surgical Sciences, IRCCS St. Orsola Polyclinic, University of Bologna, Bologna, ITALY. Acquired data, critically reviewed the manuscript draft, and approved the submitted manuscript.

Ilaria Maria Saracino, Microbiology Unit, Department of Specialized, Experimental, and Diagnostic Medicine, IRCCS St. Orsola Polyclinic, University of Bologna, Bologna, ITALY. Acquired data, critically reviewed the manuscript draft, and approved the submitted manuscript.

Matteo Pavoni, Department of Medical and Surgical Sciences, IRCCS St. Orsola Polyclinic, University of Bologna, Bologna, ITALY. Acquired data, critically reviewed the manuscript draft, and approved the submitted manuscript.

Giulia Fiorini, Department of Cardiovascular Internal Medicine, IRCCS AOU S.Orsola Bologna, Bologna, ITALY. Acquired data, critically reviewed the manuscript draft, and approved the submitted manuscript.

Blas José Gómez Rodríguez, Department of Gastroenterology, Hospital Virgen de la Macarena, Seville, SPAIN. Acquired data, critically reviewed the manuscript draft, and approved the submitted manuscript.

Diego Ledro-Cano, Department of Gastroenterology, Hospital Virgen de la Macarena, Seville, SPAIN. Acquired data, critically reviewed the manuscript draft, and approved the submitted manuscript.

L. Fernández-Salazar, Department of Gastroenterology, Hospital Clínico Universitario de Valladolid (SACYL); Department of Medicine, School of Medicine, Universidad de Valladolid, Valladolid, SPAIN. Acquired data, critically reviewed the manuscript draft, and approved the submitted manuscript.

Noelia Alcaide, Department of Gastroenterology, Hospital Clínico Universitario Valladolid, Valladolid, SPAIN. Acquired data, critically reviewed the manuscript draft, and approved the submitted manuscript.

B. Velayos, Department of Gastroenterology, Hospital Clínico Universitario Valladolid, Valladolid, SPAIN. Acquired data, critically reviewed the manuscript draft, and approved the submitted manuscript.

Tatiana Ilchishina, Gastroenterology Unit, SM-clinic, Saint-Petersburg, RUSSIA. Acquired data, critically reviewed the manuscript draft, and approved the submitted manuscript.

Jose M. Huguet, Department of Digestive Pathology, Hospital General Universitario de Valencia, Valencia, SPAIN. Acquired data, critically reviewed the manuscript draft, and approved the submitted manuscript.

Francesco Franceschi, Department of Emergency Medicine, Fondazione Policlinico Universitario "A. Gemelli" IRCCS, Università Cattolica del Sacro Cuore, Rome, ITALY. Acquired data, critically reviewed the manuscript draft, and approved the submitted manuscript.

Monica Perona, Department of Gastroenterology, Hospital Quironsalud Marbella, Marbella, SPAIN. Acquired data, critically reviewed the manuscript draft, and approved the submitted manuscript.

Sayar R. Abdulkhakov, Kazan State Medical University, Kazan Federal University, Kazan, RUSSIA. Acquired data, critically reviewed the manuscript draft, and approved the submitted manuscript.

Marco Romano, Gastroenterology and Endoscopy Unit, Dipartimento di Medicina di Precisione, Università Vanvitelli, Napoli, ITALY. Acquired data, critically reviewed the manuscript draft, and approved the submitted manuscript.

Antonietta G. Gravina, Hepatogastroenterology Unit, Università Vanvitelli, Napoli, ITALY,. Acquired data, critically reviewed the manuscript draft, and approved the submitted manuscript.

Sergey Alekseenko, Far Eastern State Medical University, Khabarovsk, RUSSIA. Acquired data, critically reviewed the manuscript draft, and approved the submitted manuscript.

Luis Bujanda, Department of Gastroenterology, Biodonostia Health Research Institute; Centro de Investigación Biomédica en Red de Enfermedades Hepáticas y Digestivas; Department of Medicine, Universidad del País Vasco (UPV/EHU), San Sebastián, SPAIN. Acquired data, critically reviewed the manuscript draft, and approved the submitted manuscript.

Umud Mahmudov, Modern Hospital, Baku, AZERBAIJAN. Acquired data, critically reviewed the manuscript draft, and approved the submitted manuscript.

Eduardo Iyo, Digestive Service, Hospital Comarcal de Inca, Inca, SPAIN. Acquired data, critically reviewed the manuscript draft, and approved the submitted manuscript.

Fernando Bermejo, Digestive Service, Hospital Universitario de Fuenlabrada, IdiPAZ, Madrid, SPAIN. Acquired data, critically reviewed the manuscript draft, and approved the submitted manuscript.

Alicia Algaba, Hospital Universitario de Fuenlabrada, Madrid, SPAIN. Acquired data, critically reviewed the manuscript draft, and approved the submitted manuscript.

Galina Tarasova, Department of Gastroenterology, Rostov State Medical University, Rostov-on-Don, RUSSIA. Acquired data, critically reviewed the manuscript draft, and approved the submitted manuscript.

Boris D Starostin, Saint-Petersburg State Budgetary Institution Healthcare City Polyclinic 38, Saint-Petersburg, RUSSIA. Acquired data, critically reviewed the manuscript draft, and approved the submitted manuscript.

Miguel Areia, Portuguese Institute for Oncology of Coimbra, Gastroenterology Department, Coimbra, Portugal. RISE-Health Research Network, Portuguese Oncology Institute of Porto, Porto, Portugal. Acquired data, critically reviewed the manuscript draft, and approved the submitted manuscript.

Javier Tejedor-Tejada, Department of Gastroenterology, Hospital Universitario de Cabueñes, Gijón, Asturias, SPAIN. Acquired data, critically reviewed the manuscript draft, and approved the submitted manuscript.

Miguel Fernández-Bermejo, Digestive Service, Clínica San Francisco, Cáceres, SPAIN. Acquired data, critically reviewed the manuscript draft, and approved the submitted manuscript.

Emin Mammadov, Internal medicine and Department of Gastroenterology, Azerbaijan State Advanced Training Institute for Doctors named after A. Aliyev, Baku, AZERBAIJAN. Acquired data, critically reviewed the manuscript draft, and approved the submitted manuscript.

Rosa Rosania, Department of Gastroenterology, Hepatology and Infectious Diseases, Otto von Guericke University Hospital, Magdeburg, GERMANY. Acquired data, critically reviewed the manuscript draft, and approved the submitted manuscript.

György Miklós Buzás, Gastroenterology, Ferencváros Health Center, Budapest, HUNGARY. Acquired data, critically reviewed the manuscript draft, and approved the submitted manuscript.

Alfredo Di Leo, Section of Gastroenterology, Department of Precision and Regenerative Medicine and Ionian Area, University of Bari, Bari, Italy. Acquired data, critically reviewed the manuscript draft, and approved the submitted manuscript.

Giuseppe Losurdo, Section of Gastroenterology, Department of Precision and Regenerative Medicine and Ionian Area, University of Bari, Bari, Italy. Acquired

data, critically reviewed the manuscript draft, and approved the submitted manuscript.

Natalia V. Bakulina, North-Western State Medical University named after I.I. Mechnikov, Saint Petersburg, RUSSIA. Acquired data, critically reviewed the manuscript draft, and approved the submitted manuscript.

Pavel Bogomolov, Universal Clinic Private Medical Center, Moscow, RUSSIA. Acquired data, critically reviewed the manuscript draft, and approved the submitted manuscript.

Judith Gomez-Camarero, Department of Gastroenterology, Hospital Universitario de Burgos, Burgos, SPAIN. Acquired data, critically reviewed the manuscript draft, and approved the submitted manuscript.

Ana Campillo, Hospital Reina Sofía, Tudela, SPAIN. Acquired data, critically reviewed the manuscript draft, and approved the submitted manuscript.

Alla Kononova, Tver State Medical University, Tver, RUSSIA. Acquired data, critically reviewed the manuscript draft, and approved the submitted manuscript.

Barbara Gomez, Gastroenterology Unit, Hospital de Mataró, Barcelona, SPAIN. Acquired data, critically reviewed the manuscript draft, and approved the submitted manuscript.

Ludmila Grigorieva, I. N. Ulianov Chuvash State University, Cheboksary, RUSSIA. Acquired data, critically reviewed the manuscript draft, and approved the submitted manuscript.

Montserrat Planella, Service of Gastroenterology, Hospital Universitari Arnau de Vilanova; IRBLL, Lleida, SPAIN. Acquired data, critically reviewed the manuscript draft, and approved the submitted manuscript.

Consuelo Ramirez, Hospital Universitari Arnau de Vilanova, Lleida, SPAIN. Acquired data, critically reviewed the manuscript draft, and approved the submitted manuscript.

Teresa Angueira, Department of Gastroenterology, Hospital General de Tomelloso, Tomelloso, SPAIN. Acquired data, critically reviewed the manuscript draft, and approved the submitted manuscript.

Farid Vidadi Guliyev, National Prime Hospital, Baku, AZERBAIJAN. Acquired data, critically reviewed the manuscript draft, and approved the submitted manuscript.

Javier Alcedo, Department of Gastroenterology, Hospital Universitario Miguel Servet, Zaragoza, SPAIN. Acquired data, critically reviewed the manuscript draft, and approved the submitted manuscript.

Renate Bumane, Department of Gastroenterology, Digestive Diseases Centre Gastro, Institute of Clinical and Preventive Medicine and Faculty of Medicine, University of Latvia, Riga, LATVIA. Acquired data, critically reviewed the manuscript draft, and approved the submitted manuscript.

Natalia V. Bakulina, I.I. Mechnikov North-Western State Medical University, Saint Petersburg, RUSSIA. Acquired data, critically reviewed the manuscript draft, and approved the submitted manuscript.

Liya Nikolaevna Belousova, I.I. Mechnikov North-Western State Medical University, Saint Petersburg, RUSSIA. Acquired data, critically reviewed the manuscript draft, and approved the submitted manuscript.

L de la Peña, Department of Gastroenterology, Viladecans Hospital, Viladecans, SPAIN. Acquired data, critically reviewed the manuscript draft, and approved the submitted manuscript.

Piotr Eder, Department of Gastroenterology, Dietetics and Internal Medicine, Poznań University of Medical Sciences; Department of Gastroenterology, H. Świącicki University Hospital, Poznan, POLAND. Acquired data, critically reviewed the manuscript draft, and approved the submitted manuscript.

Natalia Baryshnikova, Department of Internal Diseases, Faculty of Stomatology, Pavlov First Saint Petersburg State Medical University; Department of Molecular microbiology, Institute of Experimental Medicine, Saint-Petersburg, RUSSIA. Acquired data, critically reviewed the manuscript draft, and approved the submitted manuscript.

Manuel Domínguez Cajal, Gastroenterology Unit, Hospital San Jorge Huesca, SPAIN. Acquired data, critically reviewed the manuscript draft, and approved the submitted manuscript.

Joana Alves Silva, Department of Gastroenterology, Centro Hospitalar Universitário do Porto, Porto, PORTUGAL. Acquired data, critically reviewed the manuscript draft, and approved the submitted manuscript.

Pedro Almela, Digestive Service, Hospital Universitari General de Castelló; Ciencias de la Salud, Universidad CEU Cardenal Herrera, Castellón, SPAIN.



Acquired data, critically reviewed the manuscript draft, and approved the submitted manuscript.

Gema Ladrón Villanueva, Digestive Service, Hospital Universitari General de Castelló, Castellón, SPAIN. Acquired data, critically reviewed the manuscript draft, and approved the submitted manuscript.

Leticia Gimeno Pitarch, Digestive Service, Hospital Universitari General de Castelló, Castellón, SPAIN. Acquired data, critically reviewed the manuscript draft, and approved the submitted manuscript.

Diego Burgos-Santamaría, Department of Gastroenterology and Hepatology, Hospital Universitario Ramón y Cajal, Madrid SPAIN. Acquired data, critically reviewed the manuscript draft, and approved the submitted manuscript.

Natalia N. Dekhnich, Department of Faculty Therapy, Smolensk State Medical University, Smolensk, RUSSIA. Acquired data, critically reviewed the manuscript draft, and approved the submitted manuscript.

Joan Llach, Department of Gastroenterology, Hospital Clínic de Barcelona, Barcelona, SPAIN. Acquired data, critically reviewed the manuscript draft, and approved the submitted manuscript.

F Rancel Medina, Digestive Service, Complejo Asistencial Universitario de Palencia, Palencia, SPAIN. Acquired data, critically reviewed the manuscript draft, and approved the submitted manuscript.

Ramón Pajares Villarroya, Department of Gastroenterology, Hospital Universitario Infanta Sofía, San Sebastián de los Reyes, SPAIN. Acquired data, critically reviewed the manuscript draft, and approved the submitted manuscript.

Jürg Knuchel, Division of Gastroenterology and Hepatology, Medical University Department, Kantonsspital Aarau, Aarau, SWITZERLAND. Acquired data, critically reviewed the manuscript draft, and approved the submitted manuscript.

Thomas Kuntzen, Division of Gastroenterology and Hepatology, Medical University Department, Kantonsspital Aarau, Aarau, SWITZERLAND. Acquired data, critically reviewed the manuscript draft, and approved the submitted manuscript.

Anna Pakhomova, Saratov State Clinical Hospital, Saratov, RUSSIA. Acquired data, critically reviewed the manuscript draft, and approved the submitted manuscript.

Matteo Ghisa, Department of Surgery, Oncology and Gastroenterology, University of Padua, Padua, ITALY. Acquired data, critically reviewed the manuscript draft, and approved the submitted manuscript.

Fabio Farinati, Department of Surgery, Oncology and Gastroenterology, University of Padua, Padua, ITALY. Acquired data, critically reviewed the manuscript draft, and approved the submitted manuscript.

Ekaterina Yuryevna Plotnikova, Kemerovo State Medical Academy, Kemerovo, RUSSIA. Acquired data, critically reviewed the manuscript draft, and approved the submitted manuscript.

Itxaso Jiménez, Department of Gastroenterology, Hospital Universitario de Galdakao-Usansolo, Galdakao, SPAIN. Acquired data, critically reviewed the manuscript draft, and approved the submitted manuscript.

Debora Compare, Gastroenterology Unit, Department of Clinical Medicine and Surgery, University Federico II of Naples, Naples, ITALY. Acquired data, critically reviewed the manuscript draft, and approved the submitted manuscript.

Katarina Jankovic, Clinic for Gastroenterohepatology, University Clinical Centre of Serbia, Belgrade, SERBIA. Acquired data, critically reviewed the manuscript draft, and approved the submitted manuscript.

Riccardo Vasapolli, Department of Internal Medicine II, Hospital of the Ludwig Maximilians University of Munich, Munich, GERMANY. Acquired data, critically reviewed the manuscript draft, and approved the submitted manuscript.

Antonio Cuadrado, Department of Gastroenterology and Hepatology, Marqués de Valdecilla University Hospital, University of Cantabria and IDIVAL, Santander, SPAIN. Acquired data, critically reviewed the manuscript draft, and approved the submitted manuscript.

Jitka Vaculova, Department of Gastroenterology and Internal Medicine, Department of Surgery, University Hospital Brno, Faculty of Medicine, Masaryk University, Brno, CZECH REPUBLIC. Acquired data, critically reviewed the manuscript draft, and approved the submitted manuscript.

Marko Nikolić, University Hospital Centar Sestre Milosrdnice, Zagreb, CROATIA. Acquired data, critically reviewed the manuscript draft, and approved the submitted manuscript.

Isabel Pérez-Martínez, Department of Gastroenterology, Hospital Universitario Central de Asturias; Instituto de Investigación Sanitaria del Principado de Asturias (ISPA), Oviedo, SPAIN. Acquired data, critically reviewed the manuscript draft, and approved the submitted manuscript.

Ian L. P. Beales, Department of Gastroenterology, Norfolk and Norwich University Hospitals NHS Foundation Trust, Norwich, UK. Acquired data, critically reviewed the manuscript draft, and approved the submitted manuscript.

Maja Denkovski, Department of Gastroenterology, Interni Oddelek, Diagnostic Centre, Bled, SLOVENIA. Acquired data, critically reviewed the manuscript draft, and approved the submitted manuscript.

Natasa Brglez Jurecic, Department of Gastroenterology, Interni Oddelek, Diagnostic Centre, Bled, SLOVENIA. Acquired data, critically reviewed the manuscript draft, and approved the submitted manuscript.

Michal Kukla, Department of Internal Medicine and Geriatrics, Department of Endoscopy, Faculty of Medicine, Jagiellonian University Medical College, Cracow, POLAND. Acquired data, critically reviewed the manuscript draft, and approved the submitted manuscript.

Dmitrii Andreev, Russian University of Medicine, Moscow, RUSSIA. Acquired data, critically reviewed the manuscript draft, and approved the submitted manuscript.

Igor Maev, Russian University of Medicine, Moscow, RUSSIA. Acquired data, critically reviewed the manuscript draft, and approved the submitted manuscript.

## Supplementary file 2. Participating Hp-EuReg countries by European region.

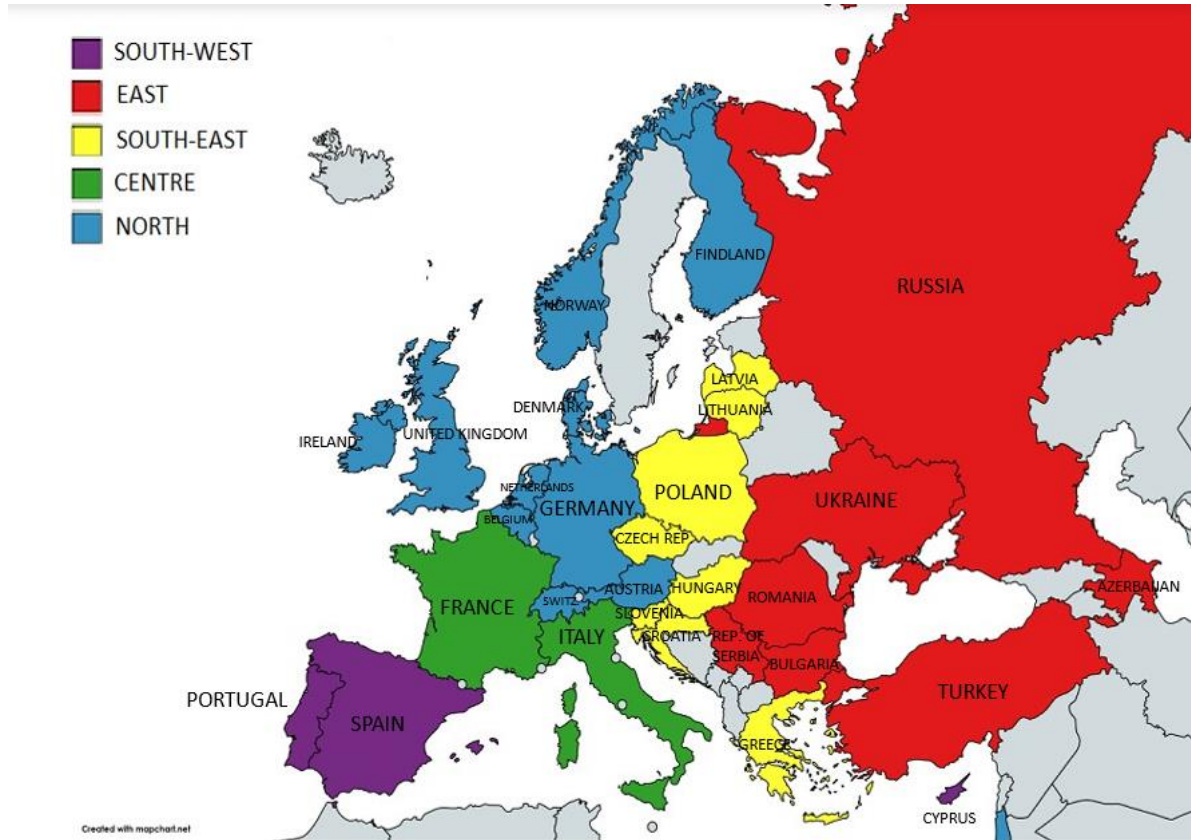

SOUTH-WEST: Portugal, Spain, Cyprus; EAST: Ukraine, Serbia, Bulgaria, Turkey, Russia, Romania. Azerbaijan; SOUTH-EAST: Croatia, Poland, Hungary, Latvia, Lithuania, Greece, Slovenia, Czech Republic CENTRE: Italy, France; NORTH: United Kingdom, Belgium, Germany, Finland, The Netherlands, Ireland, Israel, Norway, Switzerland, Austria, Denmark.

**Supplementary file 3. Regional clusters of the participating Hp-EuReg countries.**

1. **East.** Low gross domestic product per capita (GDP) (€ 2.5K to 11K): Ukraine, Serbia, Bulgaria, Turkey, Russia, Romania. Azerbaijan.

2. **South-east.** Low-medium GDP (€ 13K to 24K): Croatia, Poland, Hungary, Latvia, Lithuania, Greece, Slovenia, Czech Republic.

3. **South-west.** Medium GDP (€ 21K to 30K): Portugal, Spain, Cyprus.

4. **Centre.** Medium-high GDP (€ 30K to 40K): Italy, France.

5. **North.** High GDP (€ 40K to 80K): United Kingdom, Belgium, Germany, Finland, The Netherlands, Ireland, Israel, Norway, Switzerland, Austria, Denmark.

Supplementary file 4. Most frequent bismuth quadruple treatments schemes by country.

| Schemes          | Country |    |    |    |    |     |     |    |    |    |    |       |    |     |    |    |     |    |       |    |     |       |    |    |    |     |    | Total |     |        |
|------------------|---------|----|----|----|----|-----|-----|----|----|----|----|-------|----|-----|----|----|-----|----|-------|----|-----|-------|----|----|----|-----|----|-------|-----|--------|
|                  | BE      | BG | HR | DK | FI | FR  | DE  | GR | HU | IE | IL | IT    | LV | LT  | NO | PL | PT  | RO | RU    | RS | SI  | ES    | CH | NL | GB | UA  | CZ |       | TR  | AZ     |
| <b>PPI+ScBQT</b> |         |    |    |    |    |     |     |    |    |    |    |       |    |     |    |    |     |    |       |    |     |       |    |    |    |     |    |       |     |        |
| n                | 2       | -  | -  | -  | -  | 31  | 108 | 2  | -  | -  | 1  | 1,095 | 6  | 1   | -  | 28 | 160 | -  | 7     | 20 | 43  | 5,133 | 28 | -  | -  | -   | 14 | -     | -   | 6,679  |
| <b>PPI+CAB</b>   |         |    |    |    |    |     |     |    |    |    |    |       |    |     |    |    |     |    |       |    |     |       |    |    |    |     |    |       |     |        |
| n                | -       | -  | 1  | -  | -  | -   | -   | -  | -  | -  | 9  | -     | 2  | 119 | 2  | 1  | -   | -  | 2,810 | 12 | -   | 1,259 | -  | -  | 1  | 448 | -  | -     | 267 | 4,931  |
| <b>PPI+LAB</b>   |         |    |    |    |    |     |     |    |    |    |    |       |    |     |    |    |     |    |       |    |     |       |    |    |    |     |    |       |     |        |
| n                | -       | -  | 1  | -  | -  | -   | -   | -  | 5  | 2  | 5  | -     | -  | 172 | 8  | -  | -   | -  | 122   | 12 | 16  | 765   | -  | -  | 1  | 2   | -  | -     | 1   | 1,112  |
| <b>PPI+MTB</b>   |         |    |    |    |    |     |     |    |    |    |    |       |    |     |    |    |     |    |       |    |     |       |    |    |    |     |    |       |     |        |
| n                | 1       | 3  | 3  | 23 | -  | 104 | 3   | 4  | 3  | 26 | 1  | 53    | 21 | -   | 83 | 53 | -   | -  | 260   | 6  | 10  | 190   | 1  | -  | 40 | 7   | 1  | 2     | -   | 898    |
| <b>PPI+JAB</b>   |         |    |    |    |    |     |     |    |    |    |    |       |    |     |    |    |     |    |       |    |     |       |    |    |    |     |    |       |     |        |
| n                | -       | -  | -  | -  | -  | -   | -   | -  | -  | -  | -  | -     | -  | -   | -  | -  | -   | -  | 531   | -  | -   | -     | -  | -  | -  | 1   | -  | -     | -   | 532    |
| <b>PPI+MAB</b>   |         |    |    |    |    |     |     |    |    |    |    |       |    |     |    |    |     |    |       |    |     |       |    |    |    |     |    |       |     |        |
| n                | -       | 5  | 6  | -  | -  | -   | -   | -  | 35 | 3  | -  | -     | -  | 46  | -  | 10 | -   | -  | 194   | 1  | 40  | 22    | -  | -  | 3  | -   | 1  | -     | 1   | 367    |
| <b>PPI+MDB</b>   |         |    |    |    |    |     |     |    |    |    |    |       |    |     |    |    |     |    |       |    |     |       |    |    |    |     |    |       |     |        |
| n                | -       | -  | -  | -  | -  | -   | -   | -  | 6  | -  | 3  | -     | 2  | 1   | -  | -  | -   | -  | -     | -  | -   | 205   | -  | -  | -  | -   | -  | -     | -   | 217    |
| <b>PPI+TAB</b>   |         |    |    |    |    |     |     |    |    |    |    |       |    |     |    |    |     |    |       |    |     |       |    |    |    |     |    |       |     |        |
| n                | -       | -  | -  | -  | -  | -   | -   | -  | 17 | -  | -  | 1     | 12 | -   | 1  | -  | -   | -  | 6     | -  | -   | 2     | -  | 1  | 1  | 1   | -  | 77    | -   | 119    |
| <b>Total</b>     |         |    |    |    |    |     |     |    |    |    |    |       |    |     |    |    |     |    |       |    |     |       |    |    |    |     |    |       |     |        |
| n                | 3       | 8  | 11 | 23 | 0  | 135 | 111 | 6  | 66 | 31 | 19 | 1,149 | 43 | 339 | 94 | 92 | 160 | 0  | 3,930 | 51 | 109 | 7,576 | 29 | 1  | 46 | 459 | 16 | 79    | 269 | 14,855 |

BE, Belgium; BG, Bulgaria; HR, Croatia; DK, Denmark; FI, Finland; FR, France; DE, Germany; GR, Greece; HU, Hungary; IE, Ireland; I, Israel; IT, Italy; LV, Latvia; LT, Lithuania; NO, Norway; PL, Poland; PT, Portugal; RO, Romania; RU, Russia; RS, Serbia; SI, Slovenia; ES, Spain; CH, Switzerland; NL, The Netherlands; GB, United Kingdom; UA, Ukraine; CZ, Czech Republic; TR, Turkey; AZ, Azerbaijan; PPI, proton pump inhibitor; ScBQT, three-in-one single capsule containing bismuth, tetracycline and metronidazole; A, amoxicillin; B, bismuth salts; C, clarithromycin; D, doxycycline; J, josamycin; L, levofloxacin; M, metronidazole; T, tetracycline.

**Supplementary file 5. Proportion (%) of bismuth-containing quadruple therapy (excluding the single capsule) by European region between 2013 and 2021.**

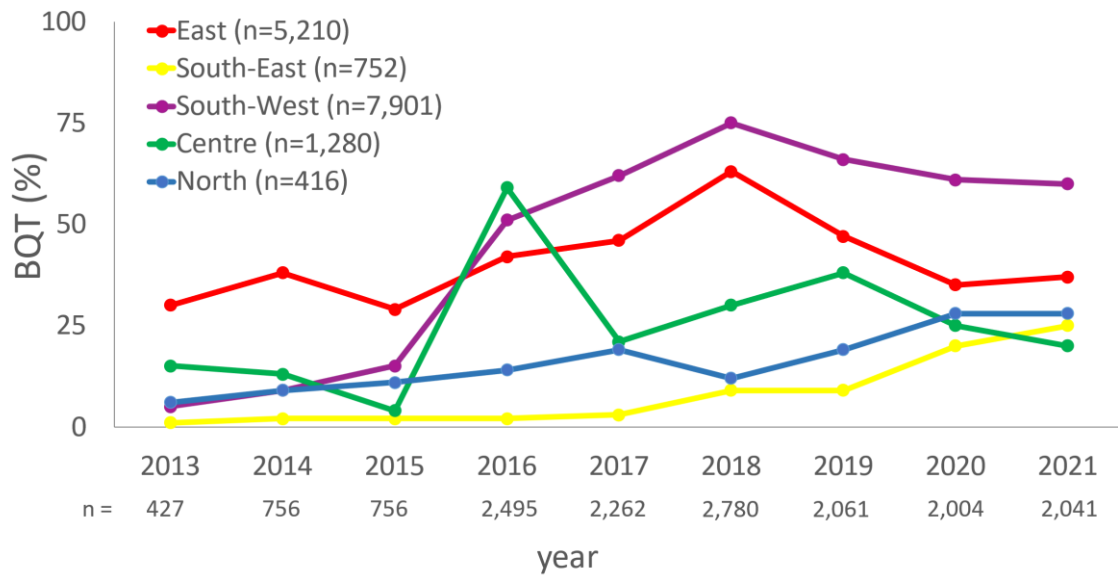

BQT: bismuth quadruple therapy; East: Ukraine, Serbia, Bulgaria, Turkey, Russia, Romania, Azerbaijan; South-East: Croatia, Poland, Hungary, Latvia, Lithuania, Greece, Slovenia, Czech Republic; South-West: Portugal, Spain, Cyprus. Centre: Italy, France; North: United Kingdom, Belgium, Germany, Finland, The Netherlands, Ireland, Israel, Norway, Switzerland, Austria, Denmark.



**Supplementary file 6. Proportion (%) of single capsule bismuth quadruple therapy prescription by European region between 2013 and 2021.**

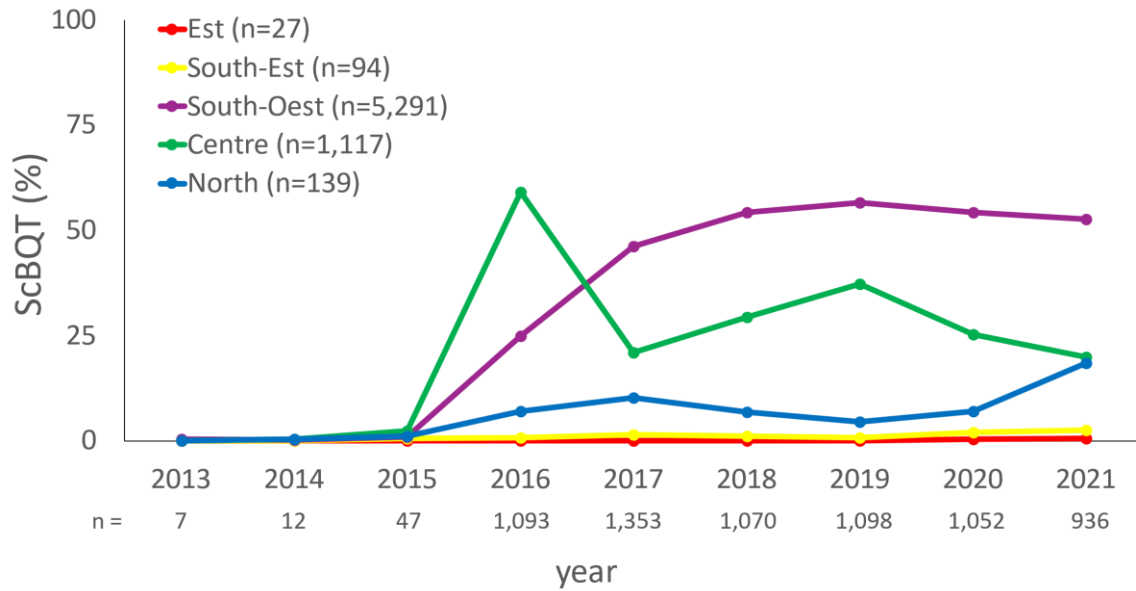

ScBQT: three-in-one single capsule containing bismuth, tetracycline and metronidazole; East: Ukraine, Serbia, Bulgaria, Turkey, Russia, Romania. Azerbaijan; South-East: Croatia, Poland, Hungary, Latvia, Lithuania, Greece, Slovenia, Czech Republic; South-West: Portugal, Spain, Cyprus. Centre: Italy, France; North: United Kingdom, Belgium, Germany, Finland, The Netherlands, Ireland, Israel, Norway, Switzerland, Austria, Denmark

**Supplementary file 7. Overall effectiveness (by modified intention-to-treat) of the different bismuth quadruple therapies schemes by European region.**

| Treatments       | European regions |             |             |            |             |
|------------------|------------------|-------------|-------------|------------|-------------|
|                  | East             | South-East  | South-West  | Centre     | North       |
| <b>PPI+ScBQT</b> |                  |             |             |            |             |
| Cure rate (%)    | <b>92.6</b>      | <b>93.3</b> | <b>91.4</b> | <b>93</b>  | <b>95.8</b> |
| n                | 27               | 75          | 5,025       | 1,003      | 118         |
| 95% CI           | 74-99            | 84-98       | 91-92       | 91-95      | 90-98       |
| <b>PPI+CAB</b>   |                  |             |             |            |             |
| Cure rate (%)    | <b>91.2</b>      | <b>93.3</b> | <b>90.9</b> | -          | 66.7        |
| n                | 2,792            | 30          | 1212        | 0          | 9           |
| 95% CI           | 90-92            | 77-99       | 89-92       | -          | 31-91       |
| <b>PPI+MTB</b>   |                  |             |             |            |             |
| Cure rate (%)    | <b>90.1</b>      | <b>90.1</b> | 79          | 84,7       | 80.7        |
| n                | 243              | 81          | 186         | 118        | 145         |
| 95% CI           | 86-93            | 81-95       | 72-85       | 77-90      | 73-87       |
| <b>PPI+MDB</b>   |                  |             |             |            |             |
| Cure rate (%)    | -                | 55,6        | 69,5        | -          | <b>100</b>  |
| n                | 0                | 9           | 200         | 0          | 2           |
| 95% CI           | -                | 23-85       | 63-76       | -          | 20-95       |
| <b>PPI+TAB</b>   |                  |             |             |            |             |
| Cure rate (%)    | 85.4             | 72.4        | <b>100</b>  | <b>100</b> | 66.7        |
| n                | 82               | 29          | 1           | 1          | 3           |
| 95% CI           | 76-92            | 53-87       | 6-89        | 6-89       | 13-98       |
| <b>PPI+LAB</b>   |                  |             |             |            |             |
| Cure rate (%)    | 87.2             | <b>98.3</b> | 84.9        | -          | 87.5        |
| n                | 117              | 58          | 727         | 0          | 16          |
| 95% CI           | 80-92            | 90-100      | 82-87       | -          | 60-98       |
| <b>PPI+MAB</b>   |                  |             |             |            |             |
| Cure rate (%)    | <b>90.5</b>      | 85.7        | <b>90.5</b> | -          | 60          |
| n                | 189              | 84          | 21          | 0          | 5           |
| 95% CI           | 85-94            | 76-92       | 68-98       | -          | 17-93       |
| <b>PPI+JAB</b>   |                  |             |             |            |             |
| Cure rate (%)    | 86.6             | -           | -           | -          | -           |
| n                | 509              | 0           | 0           | 0          | 0           |
| 95% CI           | 83-89            | -           | -           | -          | -           |
| <b>Total</b>     |                  |             |             |            |             |
| Cure rate (%)    | 90.3             | 89.1        | 89.8        | 92.2       | 86.2        |
| n                | 3,959            | 366         | 7,372       | 1,122      | 298         |
| 95% CI           | 89-91            | 85-92       | 89-91       | 90-94      | 82-90       |

PPI, proton pump inhibitor; ScBQT, three-in-one single capsule containing bismuth, tetracycline and metronidazole; A, amoxicillin; B, bismuth salts; C, clarithromycin; D, doxycycline; J, josamycin; L, levofloxacin; M, metronidazole; T, tetracycline; CI, confidence interval. Treatment schemes with 90% or more effectiveness are marked in bold.

**Supplementary file 8. Modified intention-to-treat effectiveness of bismuth quadruple therapy schemes in Europe between 2013 and 2021.**

| Scheme           | Year of treatment |       |       |       |       |       |       |         |       | TOTAL  |
|------------------|-------------------|-------|-------|-------|-------|-------|-------|---------|-------|--------|
|                  | 2013              | 2014  | 2015  | 2016  | 2017  | 2018  | 2019  | 2020    | 2021  |        |
| <b>PPI+ScBQT</b> |                   |       |       |       |       |       |       |         |       |        |
| Cure rate (%)    | 100               | 80    | 91.7  | 92.2  | 92.2  | 92.3  | 91.7  | 88.6    | 93.7  | 91.8   |
| n                | 7                 | 10    | 36    | 1,010 | 1,268 | 1,022 | 1,047 | 983     | 831   | 6,238  |
| 95% CI           | 56-99             | 44-97 | 77-98 | 90-94 | 91-94 | 90-94 | 90-93 | 86-91   | 92-95 | 91-93  |
| <b>PPI+CAB</b>   |                   |       |       |       |       |       |       |         |       |        |
| Cure rate (%)    | 93.8              | 82.4  | 88.3  | 94    | 83.8  | 89.8  | 91.5  | 94.7    | 95.5  | 91.1   |
| n                | 65                | 153   | 230   | 906   | 458   | 899   | 390   | 415     | 516   | 4,040  |
| 95 % CI          | 84-98             | 75-88 | 83-92 | 92-95 | 80-87 | 88-92 | 88-94 | 92-96   | 93-97 | 90-92  |
| <b>PPI+MTB</b>   |                   |       |       |       |       |       |       |         |       |        |
| Cure rate (%)    | 77.8              | 87.1  | 81    | 90.5  | 72.5  | 92    | 89.9  | 89      | 85.7  | 84.4   |
| n                | 180               | 209   | 63    | 42    | 51    | 50    | 79    | 73      | 49    | 796    |
| 95% CI           | 71-84             | 82-91 | 69-89 | 77-97 | 58-84 | 80-97 | 81-95 | 79-95   | 72-94 | 82-87  |
| <b>PPI+MDB</b>   |                   |       |       |       |       |       |       |         |       |        |
| Cure rate (%)    | 66.7              | 68.4  | 72.9  | 60.9  | 79.3  | 60    | 50    | 100     | 66.7  | 69.2   |
| n                | 21                | 38    | 59    | 46    | 29    | 10    | 2     | 3       | 3     | 211    |
| CI 95%           | 43-85             | 51-82 | 60-83 | 45-75 | 60-91 | 27-86 | 3-97  | 0-75    | 13-98 | 62-75  |
| <b>PPI+TAB</b>   |                   |       |       |       |       |       |       |         |       |        |
| Cure rate (%)    | 100               | 78    | 100   | -     | 50    | 83.3  | 80    | -       | 69,2  | 81.9   |
| n                | 24                | 59    | 1     | 0     | 2     | 12    | 5     | 0       | 13    | 116    |
| 95% CI           | 83-100            | 65-87 | 55-89 | -     | 3-97  | 51-97 | 30-99 | -       | 39-90 | 79-83  |
| <b>PPI+LAB</b>   |                   |       |       |       |       |       |       |         |       |        |
| Cure rate (%)    | 100               | 92.8  | 88.6  | 83.8  | 84.5  | 89.1  | 78.9  | 81.3    | 86.1  | 86.1   |
| n                | 6                 | 139   | 166   | 148   | 103   | 92    | 109   | 80      | 72    | 918    |
| 95% CI           | 52-99             | 87-96 | 83-93 | 81-84 | 81-85 | 85-90 | 76-80 | 77-82   | 81-87 | 86-86  |
| <b>PPI+MAB</b>   |                   |       |       |       |       |       |       |         |       |        |
| Cure rate (%)    | 33.3              | 77.8  | 73.3  | 85.7  | 80    | 92.6  | 90.4  | 90.3    | 91.4  | 88.6   |
| n                | 3                 | 9     | 15    | 7     | 10    | 27    | 73    | 62      | 93    | 299    |
| 95% CI           | 2-88              | 40-96 | 45-91 | 48-91 | 52-87 | 78-94 | 85-91 | 84-90.9 | 84-91 | 87-89  |
| <b>PPI+JAB</b>   |                   |       |       |       |       |       |       |         |       |        |
| Cure rate (%)    | 84.6              | 81.8  | 87    | 88.5  | 86.1  | 89.2  | 85.7  | 85.9    | 100   | 86.6   |
| n                | 13                | 55    | 23    | 61    | 79    | 93    | 98    | 78      | 8     | 509    |
| 95% CI           | 54-97             | 69-91 | 65-97 | 77-95 | 76-93 | 81-94 | 77-92 | 76-92   | 60-99 | 83-89  |
| <b>Total</b>     |                   |       |       |       |       |       |       |         |       |        |
| Cure rate (%)    | 82.8              | 84.7  | 85.8  | 91.6  | 88.9  | 90.8  | 90.3  | 89.7    | 93.4  | 90     |
| n                | 319               | 672   | 593   | 2,220 | 2,000 | 2,205 | 1,803 | 1,694   | 1,585 | 13,127 |
| 95% CI           | 78-87             | 82-83 | 83-89 | 90-93 | 87-90 | 90-92 | 89-92 | 88-91   | 92-95 | 90-91  |

PPI, proton pump inhibitor; ScBQT, three-in-one single capsule containing bismuth, tetracycline and metronidazole; A, amoxicillin; B, bismuth salts; C, clarithromycin; D, doxycycline; J, josamycin; L, levofloxacin; M, metronidazole; T, tetracycline.

**Supplementary file 9. Adherence > 90% by bismuth quadruple therapy scheme in Europe.**

| Scheme           | Adherence   |               |              |
|------------------|-------------|---------------|--------------|
|                  | %           | n             | 95% CI       |
| <b>PPI+ScBQT</b> | 96.5        | 6,202         | 96-97        |
| <b>PPI+CAB</b>   | 97.4        | 4,630         | 97-98        |
| <b>PPI+MTB</b>   | 96.6        | 817           | 95-98        |
| <b>PPI+MDB</b>   | 94.9        | 205           | 91-97        |
| <b>PPI+TAB</b>   | 96.6        | 115           | 91-99        |
| <b>PPI+LAB</b>   | 95.1        | 922           | 93-96        |
| <b>PPI+MAB</b>   | 97.8        | 305           | 95-99        |
| <b>PPI+JAB</b>   | 97          | 516           | 95-98        |
| <b>Total</b>     | <b>96.7</b> | <b>13,712</b> | <b>96-97</b> |

CI, confidence interval; PPI, proton pump inhibitor; ScBQT, three-in-one single capsule containing bismuth, tetracycline and metronidazole; A, amoxicillin; B, bismuth salts; C, clarithromycin; D, doxycycline; J, josamycin; L, levofloxacin; M, metronidazole; T, tetracycline

**Supplementary file 10. Adverse events by bismuth quadruple therapy scheme in Europe.**

| Scheme           | Adverse events |       |        |
|------------------|----------------|-------|--------|
|                  | %              | n     | 95% CI |
| <b>PPI+ScBQT</b> |                |       |        |
| Mild/Moderate    | 28.4           | 1,823 | 26-31  |
| Severe           | 5.9            | 394   | 4-9    |
| Serious          | 0.4            | 8     | 1-41   |
| <b>PPI+CAB</b>   |                |       |        |
| Mild/Moderate    | 30.0           | 1,429 | 28-33  |
| Severe           | 7.5            | 371   | 5-11   |
| Serious          | 0.2            | 3     | 3-69   |
| <b>PPI+MTB</b>   |                |       |        |
| Mild/Moderate    | 32.1           | 282   | 27-38  |
| Severe           | 7.1            | 64    | 3-17   |
| Serious          | 0.5            | 1     | 10-95  |
| <b>PPI+MDB</b>   |                |       |        |
| Mild/Moderate    | 32.1           | 69    | 22-45  |
| Severe           | 7.8            | 17    | 1-33   |
| Serious          | 0              | 0     | -      |
| <b>PPI+TAB</b>   |                |       |        |
| Mild/Moderate    | 24.4           | 29    | 11-44  |
| Severe           | 5.0            | 6     | 0-53   |
| Serious          | 0              | 0     | -      |
| <b>PPI+LAB</b>   |                |       |        |
| Mild/Moderate    | 26.2           | 250   | 0-53   |
| Severe           | 4.9            | 55    | 1-15   |
| Serious          | 0              | 0     | -      |
| <b>PPI+MAB</b>   |                |       |        |
| Mild/Moderate    | 59.6           | 187   | 1-15   |
| Severe           | 1.6            | 6     | 1-49   |
| Serious          | 0.5            | 1     | 10-95  |
| <b>PPI+JAB</b>   |                |       |        |
| Mild/Moderate    | 26.5           | 141   | 20-35  |
| Severe           | 8.8            | 47    | 3-22   |
| Serious          | 1.5            | 2     | 42-81  |

CI, confidence interval; PPI, proton pump inhibitor; ScBQT, three-in-one single capsule containing bismuth, tetracycline and metronidazole; A, amoxicillin; B, bismuth salts; C, clarithromycin; D, doxycycline; J, josamycin; L, levofloxacin; M, metronidazole; T, tetracycline. Adverse events: metallic taste, diarrhoea, nausea, abdominal pain, dyspepsia, asthenia, vomiting, anorexia, heartburn; Mild: not interfering with daily routine; Moderate: affecting daily routine; Severe: not allowing normal daily routine; Serious: causing death, hospitalization, disability, congenital anomaly, and/or requiring intervention to prevent permanent damage.
